# Supplementary material for: Thin Film Composite Membranes Based on the Polymer of Intrinsic Microporosity PIM-EA(Me2)-TB Blended with Matrimid®5218
Source: MDPI journal article supplement (doi:10.3390/membranes12090881), 2022-09-13
Supplement: s1 [file s1]

---

## Supplementary Information

# Thin film composite membranes based on the polymer of intrinsic microporosity PIM-EA(Me<sub>2</sub>)-TB blended with Matrimid®5218.

Mariagiulia Longo<sup>1</sup>, Marcello Monteleone<sup>1</sup>, Elisa Esposito<sup>1\*</sup>, Alessio Fuoco<sup>1</sup>, Elena Tocci<sup>1</sup>, Maria-Chiara Ferrari<sup>2</sup>, Bibiana Comesaña-Gándara<sup>3</sup>, Richard Malpass-Evans<sup>3</sup>, Neil B. McKeown<sup>3</sup>, Johannes C. Jansen<sup>1\*</sup>

<sup>1</sup>Institute on Membrane Technology (CNR-ITM), Via P. Bucci, 17/C, 87036 Rende (CS), Italy

<sup>2</sup>School of Engineering, University of Edinburgh, Robert Stevenson Road, Edinburgh EH9 3FB, UK

<sup>3</sup>EaStCHEM, School of Chemistry, University of Edinburgh, David Brewster Road, Edinburgh EH9 3FJ, UK

\* Correspondence: e.esposito@itm.cnr.it (E.E.); johannescarolus.jansen@cnr.it (J.C.J.)

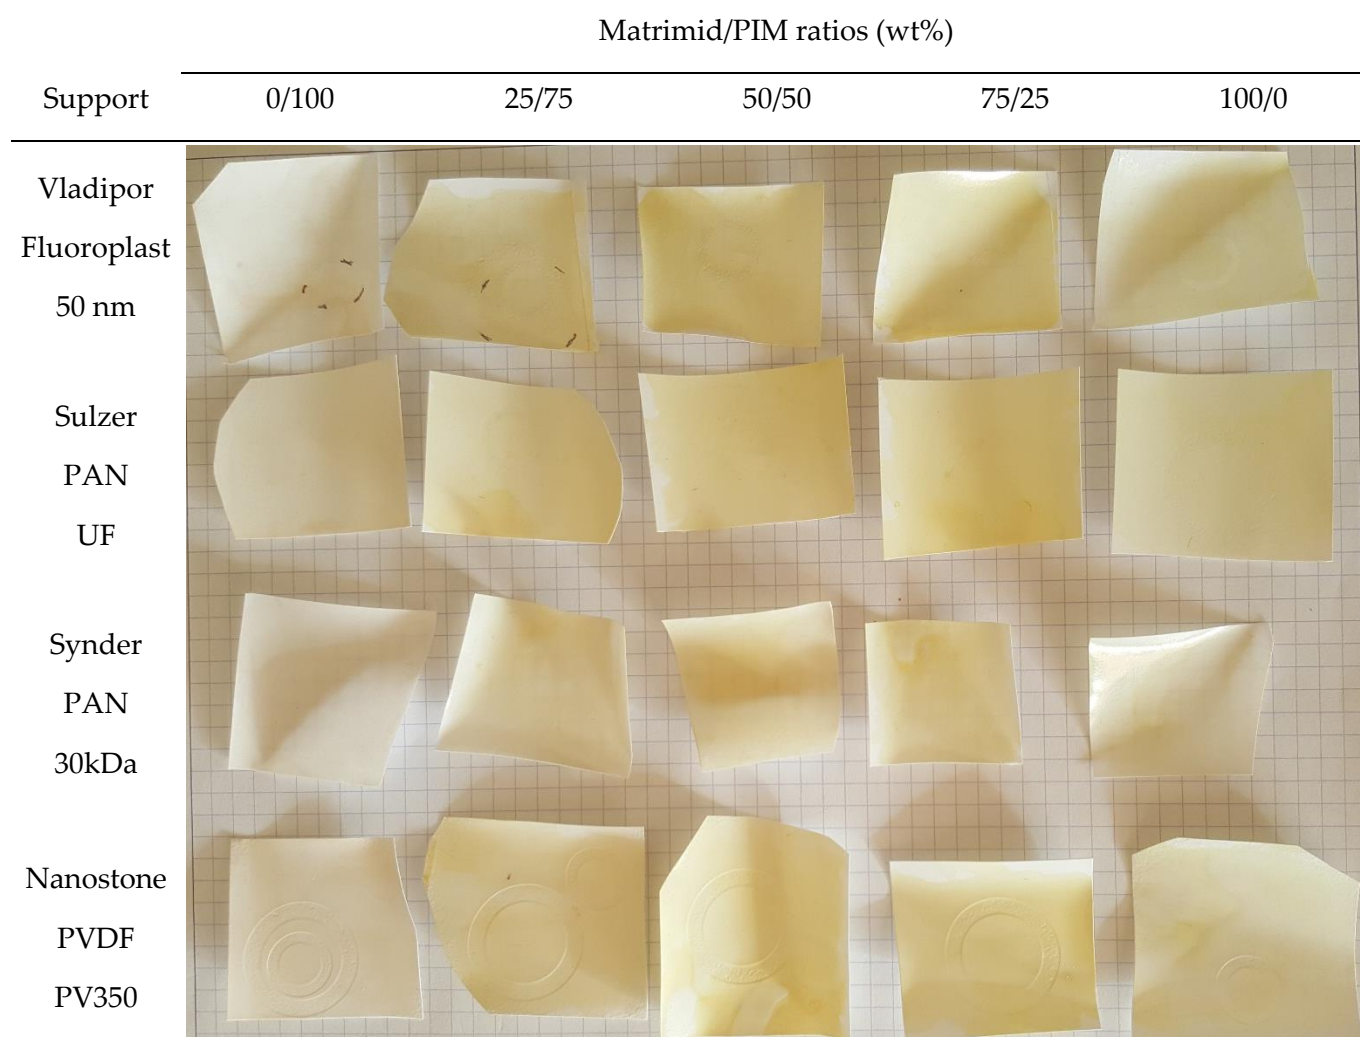

**SI Figure S1.** Images of the TFC membranes with the four different supports after the permeability tests.

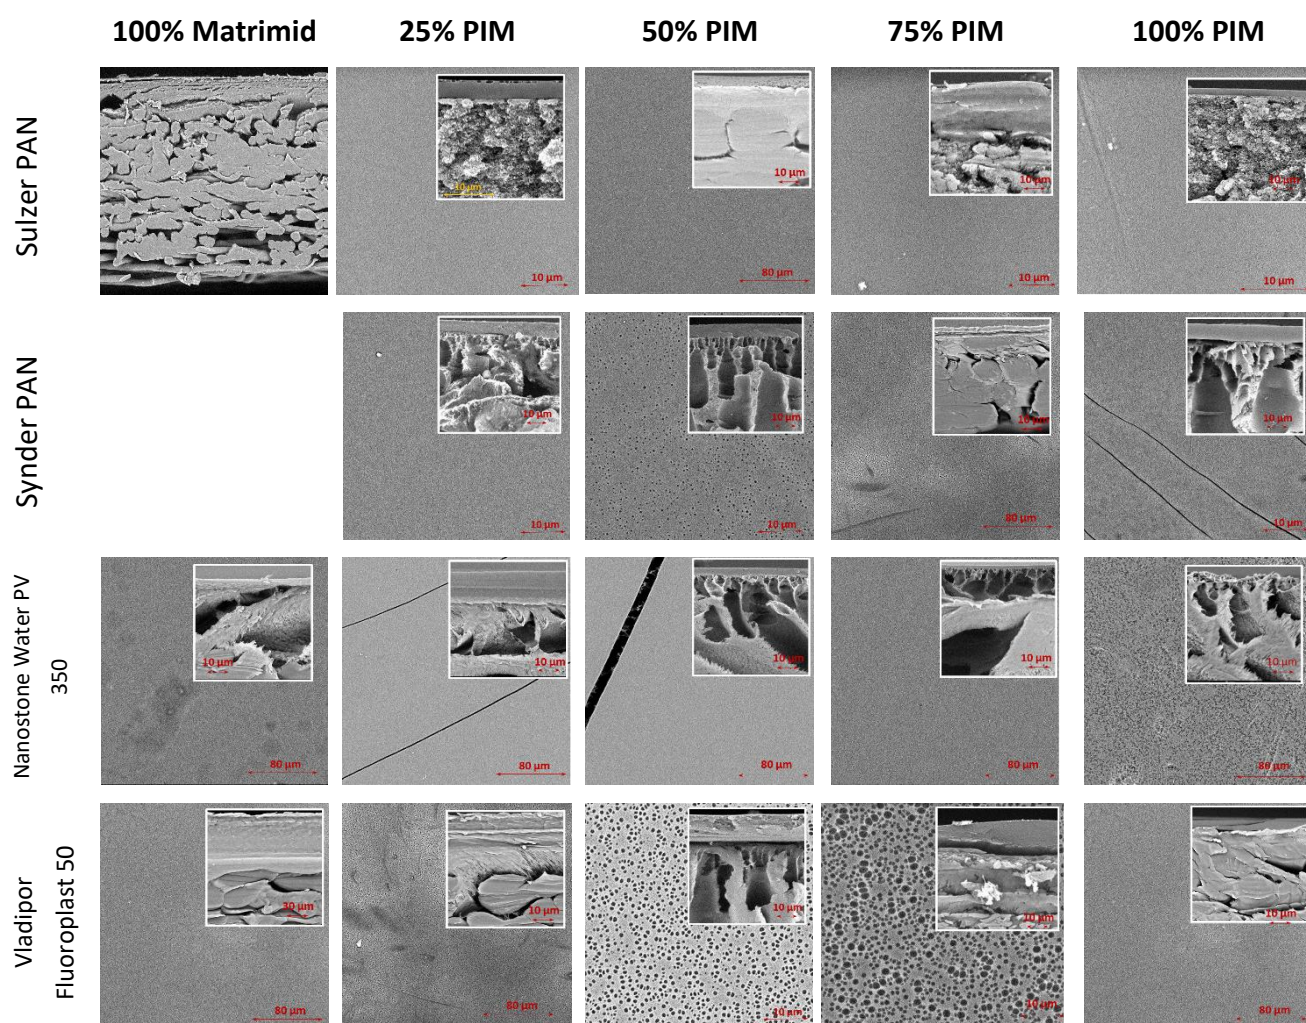

**SI Figure S2.** Cross-sectional SEM images of the of Matrimid®5218 / PIM-EA(Me<sub>2</sub>)-TB blend membranes with different blend compositions

[illegible]
